# Supplementary material
Source: HighWire-hosted journal article supplement (https://bmjopen.bmj.com/content/11/12/e052057)
Supplement: inline-supplementary-material-1 [file inline-supplementary-material-1.pdf]

**Supplementary Table 1. Study Cohort Selection**

|    | Step                                                          | N          |
|----|---------------------------------------------------------------|------------|
| 1  | Medicare Enrollees in 2016                                    | 12,139,198 |
| 2  | Had two years continuous enrollment (2015-2016)               | 5,906,400  |
| 3  | Chronic pain and anxiety diagnoses, 2016                      | 364,567    |
| 4  | Any use of opioid, benzo, SSRI/SNRI, or GABA, 2017            | 254,658    |
| 5  | Combination use of opioid, benzo, SSRI/SNRI, or GABA          | 199,949    |
| 6  | Combination use for at least 7 days                           | 155,552    |
| 7  | Age 65 or older at combination use                            | 85,586     |
| 8  | Prior Part D enrollment                                       | 84,706     |
| 9  | No Prior combination use of opioid, benzo, SSRI/SNRI, or GABA | 47,997     |
| 10 | Had complete information (birth date, region)                 | 47,964     |

<sup>a</sup>55% of 2016 Medicare beneficiaries with chronic pain and anxiety disorders had a study combination prescription in 2017.

**Supplementary Table 2. ICD-10 Codes for (A) Chronic Pain and (B) Anxiety Disorders**

| <b>A</b>                                                                                                                                                                                                                                                                                                                                                                                                                                                                                                                                                                                                                                                                                                                               |                                            |                                                                                                                                                                                                                                                              |                                                                                                                                                                                                                                                                                                                                                                                                                                                 |                                                                                                                 |
|----------------------------------------------------------------------------------------------------------------------------------------------------------------------------------------------------------------------------------------------------------------------------------------------------------------------------------------------------------------------------------------------------------------------------------------------------------------------------------------------------------------------------------------------------------------------------------------------------------------------------------------------------------------------------------------------------------------------------------------|--------------------------------------------|--------------------------------------------------------------------------------------------------------------------------------------------------------------------------------------------------------------------------------------------------------------|-------------------------------------------------------------------------------------------------------------------------------------------------------------------------------------------------------------------------------------------------------------------------------------------------------------------------------------------------------------------------------------------------------------------------------------------------|-----------------------------------------------------------------------------------------------------------------|
| Algorithms                                                                                                                                                                                                                                                                                                                                                                                                                                                                                                                                                                                                                                                                                                                             | Reference Period (# of Years) <sup>1</sup> | Valid ICD-9/MS DRG/HCPCS Codes                                                                                                                                                                                                                               | Valid ICD-10 Codes <sup>2</sup>                                                                                                                                                                                                                                                                                                                                                                                                                 | Number/Type of Claims to Qualify <sup>3</sup>                                                                   |
| Fibromyalgia, Chronic Pain and Fatigue                                                                                                                                                                                                                                                                                                                                                                                                                                                                                                                                                                                                                                                                                                 | 2 Years                                    | DX 338.2, 338.21, 338.22, 338.23, 338.29, 338.3, 338.4, 780.7, 780.71, 729.1, 729.2 ( <b>any DX on the claim</b> )                                                                                                                                           | DX G89.21, G89.22, G89.28, G89.29, G89.3, G89.4, M54.10, M54.11, M54.12, M54.13, M54.14, M54.15, M54.16, M54.17, M54.18, M60.80, M60.811, M60.812, M60.819, M60.821, M60.822, M60.829, M60.831, M60.832, M60.839, M60.841, M60.842, M60.849, M60.851, M60.852, M60.859, M60.861, M60.862, M60.869, M60.871, M60.872, M60.879, M60.88, M60.89, M60.9, M79.1, M79.10, M79.11, M79.12, M79.18, M79.2, M79.7, R53.82 ( <b>any DX on the claim</b> ) | At least one inpatient claim <b>OR</b> two other non-drug claims of any service type during the two-year period |
| <p><sup>1</sup>CCW data begins in 1999. When working with condition files prior to 2003, conditions with a reference period of 2–5 years will not have a sufficient length of data to fully meet the condition criteria in some years.</p> <p><sup>2</sup>ICD-10 codes are effective 10/2015; effective dates for ICD-9 codes vary, but are valid through 09/2015. Researchers may be interested in confirming the code(s) of interest in the accompanying claims data files.</p> <p><sup>3</sup>When two claims are required, they must occur at least one day apart. Note that the claims inclusion rules for these algorithms differ somewhat from the rules for the set of "<a href="#">CCW Chronic Condition Algorithms</a>."</p> |                                            |                                                                                                                                                                                                                                                              |                                                                                                                                                                                                                                                                                                                                                                                                                                                 |                                                                                                                 |
| <b>B</b>                                                                                                                                                                                                                                                                                                                                                                                                                                                                                                                                                                                                                                                                                                                               |                                            |                                                                                                                                                                                                                                                              |                                                                                                                                                                                                                                                                                                                                                                                                                                                 |                                                                                                                 |
| Algorithms                                                                                                                                                                                                                                                                                                                                                                                                                                                                                                                                                                                                                                                                                                                             | Reference Period (# of Years) <sup>1</sup> | Valid ICD-9/MS DRG/HCPCS Codes                                                                                                                                                                                                                               | Valid ICD-10 Codes <sup>2</sup>                                                                                                                                                                                                                                                                                                                                                                                                                 | Number/Type of Claims to Qualify <sup>3</sup>                                                                   |
| Anxiety Disorders                                                                                                                                                                                                                                                                                                                                                                                                                                                                                                                                                                                                                                                                                                                      | 2 Years                                    | DX 293.84, 300.00, 300.01, 300.02, 300.09, 300.10, 300.20, 300.21, 300.22, 300.23, 300.29, 300.3, 300.5, 300.89, 300.9, 308.0, 308.1, 308.2, 308.3, 308.4, 308.9, 309.81, 313.0, 313.1, 313.21, 313.22, 313.3, 313.82, 313.83 ( <b>any DX on the claim</b> ) | DX F06.4, F40.00, F40.01, F40.02, F40.10, F40.11, F40.210, F40.218, F40.220, F40.228, F40.230, F40.231, F40.232, F40.233, F40.240, F40.241, F40.242, F40.243, F40.248, F40.290, F40.291, F40.298, F40.8, F40.9, F41.0, F41.1, F41.3, F41.8, F41.9, F42, F42.2, F42.3, F42.4, F42.8, F42.9, F43.0, F43.10, F43.11, F43.12, F44.9, F45.8, F48.8, F48.9, F93.8, F99, R45.2, R45.5, R45.6, R45.7 ( <b>any DX on the claim</b> )                     | At least 1 inpatient <b>OR</b> 2 other non-drug claims of any service type with DX codes                        |
| <p><sup>1</sup>CCW data begins in 1999. When working with condition files prior to 2003, conditions with a reference period of 2–5 years will not have a sufficient length of data to fully meet the condition criteria in some years.</p> <p><sup>2</sup>ICD-10 codes are effective 10/2015; effective dates for ICD-9 codes vary, but are valid through 09/2015. Researchers may be interested in confirming the code(s) of interest in the accompanying claims data files.</p> <p><sup>3</sup>When two claims are required, they must occur at least one day apart. Note that the claims inclusion rules for these algorithms differ somewhat from the rules for the set of "<a href="#">CCW Chronic Condition Algorithms</a>."</p> |                                            |                                                                                                                                                                                                                                                              |                                                                                                                                                                                                                                                                                                                                                                                                                                                 |                                                                                                                 |

**Supplementary Table 3. Medications Comprising Study Drug Classes**

|                                                                                                                                                                                                                                                                                                                                                                                                                                                                                                                                                                                                                                                                                                                                                                                                                                                                                                                                                                                                                                                                                                                                                                                                                                                                                                                                                                                                                                                                                                                                                                                                                                                                                                                                                                                                                                                                                                                                                                                                                                                                                                                                                         |
|---------------------------------------------------------------------------------------------------------------------------------------------------------------------------------------------------------------------------------------------------------------------------------------------------------------------------------------------------------------------------------------------------------------------------------------------------------------------------------------------------------------------------------------------------------------------------------------------------------------------------------------------------------------------------------------------------------------------------------------------------------------------------------------------------------------------------------------------------------------------------------------------------------------------------------------------------------------------------------------------------------------------------------------------------------------------------------------------------------------------------------------------------------------------------------------------------------------------------------------------------------------------------------------------------------------------------------------------------------------------------------------------------------------------------------------------------------------------------------------------------------------------------------------------------------------------------------------------------------------------------------------------------------------------------------------------------------------------------------------------------------------------------------------------------------------------------------------------------------------------------------------------------------------------------------------------------------------------------------------------------------------------------------------------------------------------------------------------------------------------------------------------------------|
| <p><b><u>Benzodiazepines</u></b><br/> ALPRAZOLAM, ALPRAZOLAM INTENSOL, ALPRAZOLAM XR, AMBIEN, AMBIEN CR, AMBIENPAK, ATIVAN, CENTRAX, CHLORDIAZEPOXIDE, CHLORDIAZEPOXIDE &amp; CLIDINIUM, CHLORDIAZEPOXIDE AND CLIDINIUM, CHLORDIAZEPOXIDE HCL, CHLORDIAZEPOXIDE HCL-CLIDINIUM BROM, CHLORDIAZEPOXIDE HYDROCHLORIDE, CHLORDIAZEPOXIDE HYDROCHLORIDE &amp; CL, CHLORDIAZEPOXIDE HYDROCHLORIDE AND, CHLORDIAZEPOXIDE HYDROCHLORIDE-CLID, CHLORDIAZEPOXIDE HYDROCHLORIDE/CLID, CHLORDIAZEPOXIDE W/CLID BROM, CHLORDIAZEPOXIDE W/CLIDINIUM BROM, CHLORDIAZEPOXIDE-CLIDINIUM, CHLORDIAZEPOXIDE/CLIDINIUM, CHLORDIAZEPOXIDE/CLIDINIUM BROMIDE, CHLORDIAZEPOXIDEHYDROCHLORIDE AND C, CHLORDINIUM, CLINDEX, CLINOXIDE, CLOBAZAM, CLONAZEPAM, CLORAZEPATE, CLORAZEPATE DIPOTASSIUM, D-VAL, DALMANE, DIASTAT, DIASTAT ACUDIAL, DIASTAT PEDIATRIC, DIASTAT UNIVERSAL, DIAZEPAM, DIAZEPAM INTENSOL, DIAZEPAM NOVAPLUS, DIAZEPAM RECTAL DELIVERY SYSTEM, DIZAC, DORAL, DUO SPAZ, EDLUAR, ESTAZOLAM, ESZOPICLONE, FLURAZEPAM, FLURAZEPAM HCL, FLURAZEPAM HYDROCHLORIDE, FLURZEPAM, GABAVAL-5, GABAZOLAMINE, GABAZOLAMINE-0.5, GABAZOLPIDEM-5, GEN-XENE, HALCION, INTERMEZZO, KLONOPIN, KLONOPIN WAFERS, LI-GEN, LIBRAX, LIBRITABS, LIBRIUM, LORAZEPAM, LORAZEPAM AMERINET, LORAZEPAM INTENSOL, LORAZEPAM NOVAPLUS, LORAZEPAM-DEXTROSE, LORAZEPAM-SODIUM CHLORIDE, LUNESTA, MIDAZOLAM, MIDAZOLAM HCL, MIDAZOLAM HCL AMERINET CHOICE, MIDAZOLAM HCL NOVAPLUS, MIDAZOLAM HCL NOVATION, MIDAZOLAM HCL-DEXTROSE, MIDAZOLAM HCL-SODIUM CHLORIDE, MIDAZOLAM HYDROCHLORIDE, MIDAZOLAM HYDROCHLORIDE-SODIUM CHLO, MIDAZOLAM-DEXTROSE, MIDAZOLAM-SODIUM CHLORIDE, MITRAN, NIRAVAM, NOVAPLUS LORAZEPAM, NOVAPLUS MIDAZOLAM, NOVAPLUS MIDAZOLAM HCL, NOVAPLUS MIDAZOLAM HYDROCHLORIDE, ONFI, OXAZEPAM, PAXIPAM, POXI, PRAZEPAM, PREMIERPRO RX LORAZEPAM, PREMIERPRO RX MIDAZOLAM, PROBATE, PROSOM, QUARZAN, QUAZEPAM, RESTORIL, SENTRAZOLPIDEM PM-5, SERAX, SONATA, SYMPAZAN, TEMAZEPAM, TRANXENE, TRANXENE T-TAB, TRANXENE-SD, TRIAZOLAM, VALIUM, VALRELEASE, VERSED, XANAX, XANAX XR, ZALEPLON, ZEBRAX, ZETRAN, ZOLPIDEM, ZOLPIDEM TART, ZOLPIDEM TARTRATE, ZOLPIMIST</p>        |
| <p><b><u>Gabapentinoids</u></b><br/> ACTIVE-PAC WITH GABAPENTIN, CONVENIENCE PAK, CYCLO/GABA 10/300 PACK, FUSEPAQ FANATREX, GABA-V, GABAPENTIN, GABAPENTIN AVPAK, GABAPENTIN TAB 600MG, GABARONE, GRALISE, GRALISE STARTER PACK, HORIZANT, LYRICA, LYRICA CR, NEURAPTINE, NEURONTIN, PREGABALIN, SMART RX GABA-V, SMARTRX GABA KIT, THERAPENTIN-60</p>                                                                                                                                                                                                                                                                                                                                                                                                                                                                                                                                                                                                                                                                                                                                                                                                                                                                                                                                                                                                                                                                                                                                                                                                                                                                                                                                                                                                                                                                                                                                                                                                                                                                                                                                                                                                  |
| <p><b><u>Opioids</u></b><br/> ABSTRAL, ACET W/ HYDROCODONE, ACETAMIN W/ CODEINE, ACETAMIN W/CODEINE, ACETAMIN/BUTAL/CAFF/COD, ACETAMINOPHEN &amp; HYDROCODONE, ACETAMINOPHEN AND CODEINE PHOSPHATE, ACETAMINOPHEN AND TRAMADOL HYDROCHL, ACETAMINOPHEN W/ CODEINE, ACETAMINOPHEN W/CODEINE, ACETAMINOPHEN WITH CODEINE, ACETAMINOPHEN, CAFFEINE, AND DIHYDR, ACETAMINOPHEN-CAFFEINE-DIHYDROCODEI, ACETAMINOPHEN-CODEINE PHOSPHATE, ACETAMINOPHEN-HYDROCODONE BITARTRAT, ACETAMINOPHEN/BUTALBITAL/CAFFEINE/C, ACETAMINOPHEN/COD #4, ACETAMINOPHEN/CODEINE, ACETAMINOPHEN/CODEINE #2, ACETAMINOPHEN/CODEINE #3, ACETAMINOPHEN/CODEINE #4, ACETAMINOPHEN/CODEINE PHOSPHATE, ACETAMINOPHEN/HYDROCODONE BITARTRAT, ACETAMINOPHEN/OXYCODONE HYDROCHLORI, ACETAMINOPHEN/PENTAZOCINE HCL, ACETAMINOPHEN/TRAMADOL, ACETAMINOPHEN/TRAMADOL HYDROCHLORID, ACTIQ, ACTIVE-PREP KIT IV, ACTIVE-TRAMADOL KIT 8%, ALA-HIST AC, ALAHIST DHC, ALFENTA, ALFENTANIL, ALFENTANIL HCL, ALFENTANIL HCL NOVATION, ALFENTANIL NOVAPLUS, ALLAY, ALOR 5/500, ANEXSIA, ANODYNOS-DHC, ANOLOR DH 5, APAP AND CODEINE, APAP W/ CODEINE, APAP W/CODEINE, APAP W/HYDROCODONE, APAP W/OXYCODONE, APAP/CODEINE, APAP/HYDROCODONE, APAP/HYDROCODONE BITARTRATE, APAP/HYDROCODONE BITARTRATE HS, APAP/HYDROCODONE ES, APAP/OXYCODONE, APAP/PENTAZOCINE HCL, APAP/TRAMADOL, APAP/TRAMADOL HCL, APAP/TRAMADOL HYDROCHLORIDE, ARYMO ER, ASCOMP W/CODEINE, ASPIRIN W/CODEINE, ASPIRIN W/OXYCODONE, ASPIRIN, CAFFEINE, AND DIHYDROCODEI, ASPIRIN/BUTALBITAL/CAFFEINE/CODEINE, ASPIRIN/CARISOPRODOL/CODEINE, ASPIRIN/CODEINE, ASPIRIN/OXYCODONE, ASTRAMORPH, ASTRAMORPH PF, ASTRAMORPH/PF, ATROPINE AND DEMEROL, ATUSS HS, AVINZA, AZDONE, B &amp; O SUPPRETTES 15A, B &amp; O SUPPRETTES 16A, BANCAP H.C., BANCAP HC, BELLADONNA/OPIUM, BROVEX CB, BROVEX CBX, BROVEX PB C, BROVEX PB CX, BUPIV/FENTANYL CITR/SOD CL, BUPIV/HYDROMORPH/SOD CL, BUPIVACAINE HCL-FENTANYL CITRATE-SO, BUT/APAP/CAFF/COD, BUT/ASP/CAFF W/CODEINE, BUTAL/APAP/CAFF/COD, BUTALBITAL COMPOUND W/CODEINE, BUTALBITAL COMPOUND/CODEINE, BUTALBITAL, ACETAMINOPHEN AND CAFFE, BUTALBITAL, ASPIRIN, CAFFEINE &amp; COD,</p> |

BUTALBITAL,ASPIRIN,CAFFEINE, AND CO, BUTALBITAL-ACETAMINOPHEN-CAFFEINE-C, BUTALBITAL-APAP-CAFFEINE-CODEINE, BUTALBITAL-ASPIRIN-CAFFEINE-CODEINE, BUTALBITAL/APAP/CAFF/COD, BUTALBITAL/APAP/CAFFEINE/CODEINE, BUTALBITAL/ASA/CAFF/COD, BUTALBITAL/ASPIRIN/CAFFEINE W/CODEI, BUTALBITAL/ASPIRIN/CAFFEINE/CODEINE, BUTINAL W/CODEINE, CAPITAL W/CODEINE, CARBINOXAMINE-HYDROCODONE-PSEUDOEPH, CARBINOXAMINE/HYDROCODONE/PSE, CARISOPRODOL/ASPIRIN/CODEINE, CETA PLUS, CHLORPHENIRAMINE AND CODEINE, CO-GESIC, COCET, COCET PLUS, CODAR AR, CODAR D, CODAR GF, CODEGESIC, CODEINE, CODEINE PHOSPHATE, CODEINE PHOSPHATE & ACETAMINOPHEN, CODEINE SULFATE, CODITUSSIN DAC, COMBUNOX, CONZIP, COTAB A, COTAB AX, CYTUSS-HC NR, D-TANN HC, DAMASON-P, DAZIDOX, DEMEROL, DEMEROL APAP, DEMEROL HYDROCHLORIDE, DEPODUR, DEXTROSE/MORPHINE SULFATE, DHC PLUS, DILAUDID, DILAUDID-5, DILAUDID-HP, DISKETS DISPERSIBLE, DOLACET, DOLAGESIC, DOLFEN, DOLOPHINE HCL, DOLOREX FORTE, DONATUSS DC, DROPERIDOL/FENTANYL CITRATE, DSUVIA, DUOCET, DURADYNE DHC, DURAGESIC, DURAMORPH, DVORAH, DYTAN-HC, EMBEDA, EMPIRIN W/CODEINE, EN-PAIN, ENDACOF-C, ENDOCET, ENDOCODONE, ENDODAN, ENOVARX-TRAMADOL, ETH-OXYDOSE, EXALGO, EZ III, FEBRIDYNE, FENTANYL, FENTANYL CITRATE, FENTANYL CITRATE NOVAPLUS, FENTANYL CITRATE-DEXTROSE, FENTANYL CITRATE-ROPIVACAINE HCL-SO, FENTANYL CITRATE-SODIUM CHLORIDE, FENTANYL CITRATE/ROPIVACAINE HCL/SO, FENTANYL CITRATE/SODIUM CHLORIDE, FENTANYL NOVAPLUS, FENTANYL ORALET, FENTANYL TRANSDERMAL SYSTEM, FENTANYL TRANSDERMAL SYSTEM NOVAPLU, FENTANYL TROCHE, FENTANYL/BUPIVACAINE/EPINEPHRINE/SO, FENTANYL/BUPIVACAINE/SODIUM CHLORID, FENTANYL/ROPIVACAINE/SODIUM CHLORID, FENTORA, FIORICET W/CODEINE, FIORICET WITH CODEINE, FIORINAL W/CODEINE, FIORTAL W/CODEINE, FUSEPAQ SYNAPRYN, G-2, G-3, GESIC 5, H-C TUSSIVE-NR, HC/PE/DBROM, HISTEX HC, HISTUSS HC, HISTUSSIN HC, HY-PHEN, HYCET, HYCO-PAP, HYCOMED, HYCOTAB, HYDROCET, HYDROCOD BIT & ACET, HYDROCODONE BIT & ACET, HYDROCODONE BIT AND ACET, HYDROCODONE BITART/ACET, HYDROCODONE BITART/IBU, HYDROCODONE BITARTRATE & ACET, HYDROCODONE BITARTRATE & ACETAMINOP, HYDROCODONE BITARTRATE & IBUPROFEN, HYDROCODONE BITARTRATE AND ACETAMIN, HYDROCODONE BITARTRATE AND IBUPROFE, HYDROCODONE BITARTRATE-ACETAMINOPHE, HYDROCODONE BITARTRATE-IBUPROFEN, HYDROCODONE BITARTRATE/ACETAMINOPHE, HYDROCODONE BITARTRATE/APAP, HYDROCODONE BITARTRATE/IBUPROFEN, HYDROCODONE W/ APAP, HYDROCODONE W/APAP, HYDROCODONE-APAP, HYDROCODONE-CHLORPHENIRAMINE MALEAT, HYDROCODONE/ACET, HYDROCODONE/ACETAMINOPHEN, HYDROCODONE/APAP, HYDROCODONE/IBU, HYDROCODONE/IBUPROFEN, HYDROGESIC, HYDROMORPHONE, HYDROMORPHONE HCL, HYDROMORPHONE HCL-BUPIVACAINE HCL-S, HYDROMORPHONE HCL-DEXTROSE, HYDROMORPHONE HCL-ROPIVACAINE HCL-S, HYDROMORPHONE HCL-SODIUM CHLORIDE, HYDROMORPHONE HCL/SODIUM CHLORIDE, HYDROMORPHONE HYDROCHLORIDE, HYDROMORPHONE HYDROCHLORIDE-SODIUM, HYDROSTAT IR, HYSINGLA ER, IBUDONE, IBUPROFEN W/ HYDROCODONE, INFUMORPH, INFUMORPH 200, INFUMORPH 500, INNOVAR, IONSYS, ISOLLYL W/CODEINE, J-COF DHC, KADIAN, LAZANDA, LEVO-DROMORAN, LEVORPHANOL TARTRATE, LIQUICET, LORCET, LORCET 10/650, LORCET HD, LORCET PLUS, LORCET-HD, LORTAB, LORTAB 10/325, LORTAB 10/500, LORTAB 2.5/500, LORTAB 5/325, LORTAB 5/500, LORTAB 7.5/325, LORTAB 7.5/500, LORTAB ASA, LORTAB ELIXIR, LORTAB LIQUID, M-CLEAR, M-END MAX D, M-END PE, M-END WC, MAGNACET, MAR-COF BP, MARGESIC #3, MARGESIC-H, MAXIDONE, MEDIPAIN 5, MEGAGESIC, MEGAMOR, MEPEREDINE, MEPERGAN, MEPERGAN FORTIS, MEPERIDINE, MEPERIDINE HCL, MEPERIDINE HCL-PROMETHAZINE HCL, MEPERIDINE HCL-SODIUM CHLORIDE, MEPERIDINE HCL/PROMETHAZINE HCL, MEPERIDINE HCL/SODIUM CHLORIDE, MEPERIDINE HYDROCHLORIDE, MEPERIDINE HYDROCHLORIDE-SODIUM CHL, MEPERIDINE HYDROCHLORIDE/PROMETHAZI, MEPERIDINE-PROMETHAZINE, MEPERIDINE/PROMETHAZINE, MEPERITAB, Meprozone, METHADONE, METHADONE DISP, METHADONE HCL, METHADONE HCL CONCENTRATE, METHADONE HCL INTENSOL, METHADONE HCL-SODIUM CHLORIDE, METHADONE HYDROCHLORIDE, METHADOSE, METHADOSE DISP, MITIGO, MORPHABOND ER, MORPHINE, MORPHINE SULF, MORPHINE SULFATE, MORPHINE SULFATE CONTROLLED RELEASE, MORPHINE SULFATE CR, MORPHINE SULFATE ER, MORPHINE SULFATE IMMEDIATE RELEASE, MORPHINE SULFATE IN 5% DEXTROSE, MORPHINE SULFATE IN SODIUM CHLORIDE, MORPHINE SULFATE IR, MORPHINE SULFATE-BUPIVACAINE HCL-SO, MORPHINE SULFATE-SODIUM CHLORIDE, MORPHINE SULFATE/SODIUM CHLORIDE, MORPHINE-DEXTROSE, MORPHINE-SODIUM CHLORIDE, MS CONTIN, MS/L, MS/L CONCENTRATE, MS/S, MSIR, NALOCET, NALOXONE HCL/PENTAZOCINE, NALOXONE HYDROCHLORIDE/PENTAZOCINE, NALOXONE/PENTAZOCINE, NARVOX, NINJACOF-XG, NORCET, NORCO, NOTUSS-AC, NOTUSS-PE, NOVAPLUS ALFENTANIL, NOVAPLUS FENTANYL, NOVAPLUS FENTANYL TRANSDERMAL SYSTE, NUCYN TA, NUCYN TA ER, NUMORPHAN HCL, OMS, ONCET, ONSOLIS, OPANA, OPANA ER, OPIUM, ORAL TRANSMUCOSAL FENTANYL CITRATE, ORAMORPH SR, ORLAAM, OXAYDO, OXECTA, OXY IR, OXYCODONE, OXYCODONE AND ACETAMINOPHEN, OXYCODONE CR, OXYCODONE HCL, OXYCODONE HCL AND ACETAMINOPHEN, OXYCODONE

HCL CR, OXYCODONE HCL-ACETAMINOPHEN, OXYCODONE HCL-ACETAMINOPHEN AVPAK, OXYCODONE HCL-ASPIRIN, OXYCODONE HCL-IBUPROFEN, OXYCODONE HCL-OXYCODONE TEREPHTHALA, OXYCODONE HCL/OXYCODONE TEREPHTHALA, OXYCODONE HYDROCHLORIDE, OXYCODONE HYDROCHLORIDE AND IBUPROFEN, OXYCODONE HYDROCHLORIDE CR, OXYCODONE HYDROCHLORIDE/ACETAMINOPHEN, OXYCODONE W/APAP, OXYCODONE W/ASPIRIN, OXYCODONE-ACETAMINOPHEN, OXYCODONE-APAP, OXYCODONE-ASPIRIN, OXYCODONE/ACETAMINOPHEN, OXYCODONE/APAP, OXYCONTIN, OXYCONTIN CR, OXYCONTIN HYDROCHLORIDE ER, OXYFAST, OXYMORPHONE HCL, OXYMORPHONE HYDROCHLORIDE, PALLADONE, PANACET 5/500, PANASAL 5/500, PANLOR, PANLOR DC, PANLOR SS, PANLOR-DC, PANLOR-SS, PENTAZOCIN/NALOXONE, PENTAZOCINE AND NALOXONE HYDROCHLORIDE, PENTAZOCINE HCL-ACETAMINOPHEN, PENTAZOCINE HCL-NALOXONE HCL, PENTAZOCINE HYDROCHLORIDE/NALOXONE, PENTAZOCINE/APAP, PENTAZOCINE/NALOXONE, PERCOCET, PERCODAN, PERCODAN DEMI, PERCOLONE, PERLOXX, PHENAPHEN W/CODEINE, PHENAPHEN-650 W/CODEINE, PHENDACOF PLUS, PHRENILIN W/CAFFEINE/CODEINE, PHRENILIN WITH CAFFEINE AND CODEINE, PLURATUSS, POLY HIST DHC, POLY-TUSSIN, POLY-TUSSIN AC, POLY-TUSSIN EX, POLYGESIC, PREMIERPRO RX ALFENTANIL HCL, PRIMALEV, PRIMLEV, PROCET, PROPAIN HC, PYREGESIC-C, RELATUSS HC, REMIFENTANIL HCL-SODIUM CHLORIDE, REMIFENTANIL HYDROCHLORIDE, REPRESXAIN, RESCUDOSE, RID-A-PAIN W/CODEINE, RMS, RO-CODONE, ROXANOL, ROXANOL UD, ROXANOL-T, ROXICET, ROXICODONE, ROXICODONE INTENSOL, ROXIPRIN, ROXYBOND, RYBIX ODT, RYZOLT, SIMPLIST DILAUDID, SOMA COMPOUND W/CODEINE, STAGESIC, STAGESIC-10, SUBLIMAZE, SUBSYS, SUFENTA, SUFENTANIL CITRATE, SUFENTANIL CITRATE NOVAPLUS, SUFENTANIL CITRATE-BUPIVACAINE HCL-, SUFENTANIL CITRATE-ROPIVACAINE HCL-, SYMTAN, SYMTAN A, SYNALGOS-DC, T-GESIC, TALACEN, TALWIN, TALWIN COMPOUND, TALWIN LACTATE, TALWIN NX, THERACODOPHEN-325, THERACODOPHEN-750, THERACODOPHEN-LOW-90, THERATRAMADOL-60, THERATRAMADOL-90, TL-HIST CD, TL-HIST CM, TRAMADOL, TRAMADOL HCL, TRAMADOL HCL-ACETAMINOPHEN, TRAMADOL HCL/ACETAMINOPHEN, TRAMADOL HCL/ACETAMINOPHEN AVPAK, TRAMADOL HCL-HYDROCHLORIDE, TRAMADOL HYDROCHLORIDE & APAP, TRAMADOL HYDROCHLORIDE AND ACETAMIN, TRAMADOL HYDROCHLORIDE-ACETAMINOPHEN, TRAMADOL HYDROCHLORIDE/ACETAMINOPHEN, TRAMADOL HYDROCHLORIDE/APAP, TRAMADOL/ACETAMINOPHEN, TRAMADOL/APAP, TREZIX, TRI-VENT HC, TRICODE AR, TRICODE GF, TUSSPLEX, TUXARIN ER, TYLENOL W/CODEINE, TYLENOL W/CODEINE #1, TYLENOL W/CODEINE #2, TYLENOL W/CODEINE #3, TYLENOL W/CODEINE #4, TYLENOL W/CODEINE NO 4, TYLENOL WITH CODEINE, TYLENOL WITH CODEINE NO. 3, TYLENOL WITH CODEINE NO. 4, TYLOX, UGESIC, ULTIVA, ULTRACET, ULTRAM, ULTRAM ER, VANACET, VENDONE, VERDROCET, VICODIN, VICODIN ES, VICODIN HP, VICOPROFEN, VOPAC, XARTEMIS XR, XODOL, XODOL 5/300, XODOL 7.5/300, XOLOX, XTAMPZA ER, XYLON 10, Z-TUSS AC, Z-TUSS E, ZAMICET, ZERLOR, ZOXYDOL ER, ZOLVIT, ZUTRIPRO, ZYDONE

**SSRI/SNRI**

BRISDELLE, CELEXA, CITALOPRAM, CITALOPRAM HYDROBROMIDE, CYMBALTA, DERMACINRX DPN PAK, DESVENLAFAXINE, DULOXETINE, DULOXETINE HCL, DULOXETINE HCL AVPAK, DULOXETINE HYDROCHLORIDE, EFFEXOR, EFFEXOR XR, EFFEXOR-XR, ESCITALOPRAM, ESCITALOPRAM OXALATE, FETZIMA, FETZIMA TITRATION PACK, FLUOXETINE, FLUOXETINE HCL, FLUOXETINE HCL AVPAK, FLUOXETINE HYDROCHLORIDE, FLUVOXAMINE, FLUVOXAMINE MALEATE, GABOXETINE, IRENKA, KHEDEZLA, LEXAPRO, LUVOX, LUVOX CR, PAROXETIN, PAROXETINE, PAROXETINE HCL, PAROXETINE HCL AVPAK, PAROXETINE HYDROCHLORIDE, PAROXETINE MESYLATE, PAXIL, PAXIL CR, PEVEVA, PRISTIQ, PROZAC, PROZAC WEEKLY, RAPIFLUX, SARAFEM, SELFEMRA, SENTRAFLOX AM-10, SENTROXATINE, SERTRALINE, SERTRALINE HCL, SERTRALINE HYDROCHLORIDE, VENLAFAXINE, VENLAFAXINE HCL, VENLAFAXINE HCL AVPAK, VENLAFAXINE HCL XR, VENLAFAXINE HYDROCHLORIDE, VIIBRYD, VIIBRYD STARTER PACK, VIIBRYD TITRATION PACK, ZOLOFT

**Supplementary Table 4. ICD-10 Diagnosis Codes for Falls and Fractures**

| Fall ICD-10-CM | Fracture ICD-10-CM |          |          |          |          |          |          |          |
|----------------|--------------------|----------|----------|----------|----------|----------|----------|----------|
| W00.x          | S02.0XXA           | S06.336A | S14.101A | S32.810B | S42.493A | S62.123B | S72.453B | S92.109A |
| W01.x          | S02.0XXB           | S06.337A | S14.102A | S32.811A | S42.493B | S62.126A | S72.453C | S92.109B |
| W05.x-W19.x    | S02.101A           | S06.338A | S14.103A | S32.811B | S42.496A | S62.126B | S72.456A | S92.201A |
| V00.11         | S02.101B           | S06.339A | S14.104A | S32.82XA | S42.496B | S62.133A | S72.456B | S92.201B |
| V00.13         | S02.102A           | S06.360A | S14.105A | S32.82XB | S42.90XA | S62.133B | S72.456C | S92.202A |
| V00.14         | S02.102B           | S06.361A | S14.106A | S32.89XA | S42.90XB | S62.136A | S72.499A | S92.202B |
| V00.15         | S02.109A           | S06.362A | S14.107A | S32.89XB | S42.91XA | S62.136B | S72.499B | S92.209A |
| V00.31         | S02.109B           | S06.363A | S14.111A | S32.9XXA | S42.91XB | S62.143A | S72.499C | S92.209B |
| V00.32         | S02.2XXA           | S06.364A | S14.112A | S32.9XXB | S42.92XA | S62.143B | S72.90XA | S92.213A |
|                | S02.2XXB           | S06.365A | S14.113A | S34.131A | S42.92XB | S62.146A | S72.90XB | S92.213B |
|                | S02.30XA           | S06.366A | S14.114A | S34.132A | S52.009A | S62.146B | S72.90XC | S92.216A |
|                | S02.30XB           | S06.367A | S14.115A | S34.139A | S52.009B | S62.153A | S72.90XE | S92.216B |
|                | S02.31XA           | S06.368A | S14.116A | S34.3XXA | S52.009C | S62.153B | S72.91XA | S92.223A |
|                | S02.31XB           | S06.369A | S14.117A | S42.009A | S52.011A | S62.156A | S72.91XE | S92.223B |
|                | S02.32XA           | S06.4X0A | S14.121A | S42.009B | S52.012A | S62.156B | S72.92XA | S92.226A |
|                | S02.32XB           | S06.4X1A | S14.122A | S42.013A | S52.019A | S62.163A | S72.92XE | S92.226B |
|                | S02.400A           | S06.4X2A | S14.123A | S42.013B | S52.023A | S62.163B | S82.009A | S92.233A |
|                | S02.400B           | S06.4X3A | S14.124A | S42.016A | S52.023B | S62.166A | S82.009B | S92.233B |
|                | S02.401A           | S06.4X4A | S14.125A | S42.016B | S52.023C | S62.166B | S82.009C | S92.236A |
|                | S02.401B           | S06.4X5A | S14.126A | S42.019A | S52.026A | S62.173A | S82.101A | S92.236B |
|                | S02.402A           | S06.4X6A | S14.127A | S42.019B | S52.026B | S62.173B | S82.101B | S92.243A |
|                | S02.402B           | S06.4X7A | S14.131A | S42.023A | S52.026C | S62.176A | S82.102A | S92.243B |
|                | S02.40AA           | S06.4X8A | S14.132A | S42.023B | S52.043A | S62.176B | S82.102B | S92.246A |
|                | S02.40AB           | S06.4X9A | S14.133A | S42.026A | S52.043B | S62.183A | S82.109A | S92.246B |
|                | S02.40BA           | S06.5X0A | S14.134A | S42.026B | S52.043C | S62.183B | S82.109B | S92.253A |
|                | S02.40BB           | S06.5X1A | S14.135A | S42.033A | S52.046A | S62.186A | S82.109C | S92.253B |
|                | S02.40CA           | S06.5X2A | S14.136A | S42.033B | S52.046B | S62.186B | S82.161A | S92.256A |
|                | S02.40CB           | S06.5X3A | S14.137A | S42.036A | S52.046C | S62.233A | S82.162A | S92.256B |
|                | S02.40DA           | S06.5X4A | S14.151A | S42.036B | S52.099A | S62.233B | S82.169A | S92.301A |
|                | S02.40DB           | S06.5X5A | S14.152A | S42.109A | S52.099B | S62.236A | S82.201A | S92.301B |
|                | S02.40EA           | S06.5X6A | S14.153A | S42.109B | S52.099C | S62.236B | S82.201B | S92.302A |
|                | S02.40EB           | S06.5X7A | S14.154A | S42.113A | S52.109A | S62.309A | S82.201C | S92.302B |
|                | S02.40FA           | S06.5X8A | S14.155A | S42.113B | S52.109B | S62.309B | S82.202A | S92.309A |
|                | S02.40FB           | S06.5X9A | S14.156A | S42.116A | S52.109C | S62.319A | S82.202B | S92.309B |
|                | S02.42XA           | S06.6X0A | S14.157A | S42.116B | S52.111A | S62.319B | S82.209A | S92.403A |
|                | S02.42XB           | S06.6X1A | S22.019A | S42.123A | S52.112A | S62.329A | S82.209B | S92.403B |
|                | S02.600A           | S06.6X2A | S22.019B | S42.123B | S52.119A | S62.329B | S82.209C | S92.406A |
|                | S02.600B           | S06.6X3A | S22.029A | S42.126A | S52.123A | S62.339A | S82.311A | S92.406B |
|                | S02.601A           | S06.6X4A | S22.029B | S42.126B | S52.123B | S62.339B | S82.312A | S92.503A |
|                | S02.601B           | S06.6X5A | S22.039A | S42.133A | S52.123C | S62.349A | S82.319A | S92.503B |
|                | S02.602A           | S06.6X6A | S22.039B | S42.133B | S52.126A | S62.349B | S82.401A | S92.506A |
|                | S02.602B           | S06.6X7A | S22.049A | S42.136A | S52.126B | S62.359A | S82.401B | S92.506B |
|                | S02.609A           | S06.6X8A | S22.049B | S42.136B | S52.126C | S62.359B | S82.401C | S92.819A |
|                | S02.609B           | S06.6X9A | S22.059A | S42.143A | S52.133A | S62.369A | S82.402A | S92.819B |
|                | S02.610A           | S06.890A | S22.059B | S42.143B | S52.133B | S62.369B | S82.402B | S92.909A |
|                | S02.610B           | S06.891A | S22.069A | S42.146A | S52.133C | S62.399A | S82.409A | S92.909B |
|                | S02.611A           | S06.892A | S22.069B | S42.146B | S52.136A | S62.399B | S82.409B | S99.109A |
|                | S02.611B           | S06.893A | S22.079A | S42.153A | S52.136B | S62.509A | S82.409C | S99.109B |
|                | S02.612A           | S06.894A | S22.079B | S42.153B | S52.136C | S62.509B | S82.53XA | S99.119A |
|                | S02.612B           | S06.895A | S22.089A | S42.156A | S52.189A | S62.513A | S82.53XB | S99.119B |
|                | S02.620A           | S06.896A | S22.089B | S42.156B | S52.189B | S62.513B | S82.53XC | S99.129A |

|          |          |          |          |          |          |          |          |
|----------|----------|----------|----------|----------|----------|----------|----------|
| S02.620B | S06.897A | S22.20XA | S42.199A | S52.189C | S62.516A | S82.56XA | S99.129B |
| S02.621A | S06.898A | S22.20XB | S42.199B | S52.209A | S62.516B | S82.56XB | S99.139A |
| S02.621B | S06.899A | S22.39XA | S42.209A | S52.209B | S62.523A | S82.56XC | S99.139B |
| S02.622A | S06.9X0A | S22.39XB | S42.209B | S52.209C | S62.523B | S82.63XA | S99.149A |
| S02.622B | S06.9X1A | S22.49XA | S42.213A | S52.279A | S62.526A | S82.63XB | S99.149B |
| S02.630A | S06.9X2A | S22.49XB | S42.213B | S52.279B | S62.526B | S82.63XC | S99.199A |
| S02.630B | S06.9X3A | S22.5XXA | S42.216A | S52.279C | S62.609A | S82.66XA | S99.199B |
| S02.631A | S06.9X4A | S22.5XXB | S42.216B | S52.309A | S62.609B | S82.66XB |          |
| S02.631B | S06.9X5A | S22.9XXA | S42.253A | S52.309B | S62.619B | S82.66XC |          |
| S02.632A | S06.9X6A | S22.9XXB | S42.253B | S52.309C | S62.629A | S82.811A |          |
| S02.632B | S06.9X7A | S24.101A | S42.256A | S52.509A | S62.629B | S82.812A |          |
| S02.640A | S06.9X8A | S24.102A | S42.256B | S52.509B | S62.639A | S82.819A |          |
| S02.640B | S06.9X9A | S24.103A | S42.293A | S52.509C | S62.639B | S82.821A |          |
| S02.641A | S12.000A | S24.104A | S42.293B | S52.521A | S62.649A | S82.822A |          |
| S02.641B | S12.000B | S24.111A | S42.295A | S52.522A | S62.649B | S82.829A |          |
| S02.642A | S12.001A | S24.112A | S42.296A | S52.529A | S62.659A | S82.831A |          |
| S02.642B | S12.001B | S24.113A | S42.296B | S52.539A | S62.659B | S82.831B |          |
| S02.650A | S12.100A | S24.114A | S42.309A | S52.539B | S62.669A | S82.832A |          |
| S02.650B | S12.100B | S24.131A | S42.309B | S52.539C | S62.669B | S82.832B |          |
| S02.651A | S12.101A | S24.132A | S42.399A | S52.549A | S62.90XA | S82.839A |          |
| S02.651B | S12.101B | S24.133A | S42.399B | S52.609A | S62.90XB | S82.839B |          |
| S02.652A | S12.200A | S24.134A | S42.409A | S52.609B | S72.009A | S82.839C |          |
| S02.652B | S12.200B | S24.151A | S42.409B | S52.609C | S72.009B | S82.843A |          |
| S02.66XA | S12.2018 | S24.152A | S42.413A | S52.621A | S72.009C | S82.843B |          |
| S02.66XB | S12.201A | S24.153A | S42.413B | S52.622A | S72.309A | S82.843C |          |
| S02.670A | S12.300A | S24.154A | S42.416A | S52.629A | S72.309B | S82.846A |          |
| S02.670B | S12.300B | S32.10XA | S42.416B | S52.90XA | S72.309C | S82.846B |          |
| S02.671A | S12.301A | S32.10XB | S42.433A | S52.90XB | S72.409A | S82.846C |          |
| S02.671B | S12.301B | S32.2XXA | S42.436A | S52.90XC | S72.409B | S82.853A |          |
| S02.672A | S12.400A | S32.2XXB | S42.443A | S52.91XA | S72.409C | S82.853B |          |
| S02.672B | S12.400B | S32.309A | S42.446A | S52.91XB | S72.413A | S82.853C |          |
| S02.69XA | S12.401A | S32.309B | S42.453A | S52.92XA | S72.413B | S82.856A |          |
| S02.69XB | S12.401B | S32.409A | S42.453B | S52.92XB | S72.413C | S82.856B |          |
| S02.91X6 | S12.500A | S32.409B | S42.456A | S59.109A | S72.416A | S82.856C |          |
| S02.91XA | S12.500B | S32.501A | S42.456B | S62.009A | S72.416B | S82.899A |          |
| S02.92X6 | S12.501A | S32.501B | S42.463A | S62.009B | S72.416C | S82.899B |          |
| S02.92XA | S12.501B | S32.502A | S42.463B | S62.109A | S72.443A | S82.899C |          |
| S06.330A | S12.600A | S32.502B | S42.466A | S62.109B | S72.443B | S82.90XA |          |
| S06.331A | S12.600B | S32.509A | S42.466B | S62.113A | S72.443C | S82.90XB |          |
| S06.332A | S12.601A | S32.509B | S42.473A | S62.113B | S72.446A | S82.91XA |          |
| S06.333A | S12.601B | S32.609A | S42.473B | S62.116A | S72.446B | S82.91XB |          |
| S06.334A | S12.8XXA | S32.609B | S42.476A | S62.116B | S72.446C | S82.92XA |          |
| S06.335A | S12.9XXA | S32.810A | S42.476B | S62.123A | S72.453A | S82.92XB |          |

**Supplementary Table 5. Stratified Hazard Ratios<sup>a</sup> for the Association of Drug Combination and Fall, Stratifying by Alzheimer's/Non-Alzheimer's**

| Drug Combo |                       | Alzheimer's       | No Alzheimer's    |
|------------|-----------------------|-------------------|-------------------|
|            | Benzo + Opioid        | REF               | REF               |
|            | ≥3 combination        | 1.26 (0.99, 1.59) | 1.71 (1.22, 2.39) |
|            | Benzo + GABA          | 0.87 (0.72, 1.05) | 1.53 (1.16, 2.02) |
|            | Benzo + SSRI or SNRI  | 0.70 (0.54, 0.91) | 1.30 (0.92, 1.85) |
|            | GABA + SSRI or SNRI   | 1.00 (0.82, 1.22) | 1.17 (0.86, 1.59) |
|            | Opioid + GABA         | 1.10 (0.92, 1.32) | 1.41 (1.07, 1.87) |
|            | Opioid + SSRI or SNRI | 1.04 (0.86, 1.26) | 1.27 (0.93, 1.74) |

<sup>a</sup>Based off the fully adjusted multivariate model (model 3) from the main analysis.



**Supplementary Table 6. Standardized Differences<sup>a</sup> for all Pairwise Comparisons Before and After Inverse Probability of Treatment Weighting with Propensity Score**

|                            | Standardized Differences Compared to Benzo/Opioid Before IPTW with Propensity Score |                |                 |                 |               |             |                          | Standardized Differences Compared to Benzo/Opioid After IPTW with Propensity Score - Falls Model |                |                 |                 |               |             |                          | Standardized Differences Compared to Benzo/Opioid After IPTW with Propensity Score - Fractures Model |                |                 |                 |               |             |                          |        |
|----------------------------|-------------------------------------------------------------------------------------|----------------|-----------------|-----------------|---------------|-------------|--------------------------|--------------------------------------------------------------------------------------------------|----------------|-----------------|-----------------|---------------|-------------|--------------------------|------------------------------------------------------------------------------------------------------|----------------|-----------------|-----------------|---------------|-------------|--------------------------|--------|
|                            | Benzo/<br>GABA                                                                      | Benzo/<br>SSRI | Opioid/<br>GABA | Opioid/<br>SSRI | GABA/<br>SSRI | 3+<br>Combo | Max<br>Diff <sup>b</sup> | Benzo/<br>GABA                                                                                   | Benzo/<br>SSRI | Opioid/<br>GABA | Opioid/<br>SSRI | GABA/<br>SSRI | 3+<br>Combo | MAX<br>Diff <sup>b</sup> | Benzo/<br>GABA                                                                                       | Benzo/<br>SSRI | Opioid/<br>GABA | Opioid/<br>SSRI | GABA/<br>SSRI | 3+<br>Combo | MAX<br>Diff <sup>b</sup> |        |
|                            | Sex                                                                                 | 0.1464         | 0.0668          | 0.0807          | -0.0297       | 0.071       | 0.0851                   | 0.1464                                                                                           | -0.0054        | -0.0075         | -0.0036         | -0.0083       | 0.0017      | -0.0131                  | 0.0131                                                                                               | -0.0051        | -0.0067         | -0.0031         | -0.0083       | 0.0029      | -0.0143                  | 0.0143 |
| Age                        | 0.0302                                                                              | 0.0439         | 0.0287          | 0.0592          | 0.0561        | 0.1297      | 0.1297                   | 0.0293                                                                                           | 0              | 0               | 0.0218          | 0.0218        | 0.0218      | 0.0293                   | 0.0293                                                                                               | 0              | 0               | 0.0218          | 0.0218        | 0.0218      | 0.0218                   | 0.0293 |
| Race                       | 0.2496                                                                              | 0.1511         | 0.0845          | 0.1222          | 0.095         | 0.0614      | 0.2496                   | 0.044                                                                                            | 0.0789         | 0               | 0               | 0             | 0.0642      | 0.0789                   | 0.044                                                                                                | 0.0789         | 0               | 0               | 0             | 0.044       | 0.0789                   |        |
| Region                     | 0.219                                                                               | 0.1665         | 0.073           | 0.0337          | 0.1315        | 0.0587      | 0.219                    | 0                                                                                                | 0.0289         | 0.0289          | 0.0289          | 0             | 0.0289      | 0.0289                   | 0                                                                                                    | 0.0289         | 0.0289          | 0.0289          | 0             | 0.0289      | 0.0289                   |        |
| Original Entitlement       | 0.2563                                                                              | 0.1666         | 0.0551          | -0.0339         | 0.1263        | -0.0683     | 0.2563                   | -0.0104                                                                                          | -0.0115        | -0.0032         | -0.0051         | 0.0095        | -0.0018     | 0.0115                   | -0.0103                                                                                              | -0.0119        | -0.0031         | -0.0051         | 0.0095        | -0.0037     | 0.0119                   |        |
| Medicaid Dual Eligibility  | -0.1911                                                                             | -0.1131        | 0.0144          | 0.0911          | -0.0116       | 0.079       | 0.1911                   | 0.0108                                                                                           | 0.0064         | -0.0037         | -0.0002         | -0.0087       | -0.0075     | 0.0108                   | 0.0109                                                                                               | 0.008          | -0.0037         | -0.0004         | -0.0087       | -0.0051     | 0.0109                   |        |
| History of Fall            | -0.0343                                                                             | -0.0504        | 0.1333          | 0.0406          | 0.1054        | 0.1461      | 0.1461                   | 0.0078                                                                                           | -0.0017        | 0.0013          | -0.016          | -0.0073       | -0.0112     | 0.016                    | 0                                                                                                    | 0              | 0               | 0               | 0             | 0           | 0                        |        |
| History of Fracture        | -0.0381                                                                             | -0.0599        | 0.0804          | 0.0273          | 0.0392        | 0.1019      | 0.1019                   | 0                                                                                                | 0              | 0               | 0               | 0             | 0           | 0                        | 0.0125                                                                                               | 0.0136         | 0.0023          | -0.0032         | 0.0007        | 0.0064      | 0.0136                   |        |
| History of Hospitalization | -0.1479                                                                             | -0.1045        | 0.0974          | 0.1497          | 0.0626        | 0.1776      | 0.1776                   | 0.0241                                                                                           | 0.0131         | 0.0038          | 0.0104          | -0.0089       | -0.0038     | 0.0241                   | 0.024                                                                                                | 0.0144         | 0.0034          | 0.0107          | -0.0085       | -0.0019     | 0.024                    |        |
| Alcohol Use Disorders      | -0.0122                                                                             | 0.0016         | 0.039           | 0.0436          | 0.0467        | 0.0321      | 0.0467                   | 0.0146                                                                                           | 0.0032         | -0.0004         | 0.0092          | 0.0079        | -0.0027     | 0.0146                   | 0.0139                                                                                               | 0.0037         | -0.001          | 0.0091          | 0.0075        | -0.0019     | 0.0139                   |        |
| Alzheimer/Dementia         | 0.0994                                                                              | 0.4384         | 0.1967          | 0.0875          | 0.1852        | 0.1694      | 0.4384                   | 0.017                                                                                            | 0.0079         | -0.0084         | -0.0035         | -0.002        | -0.0092     | 0.017                    | 0.0175                                                                                               | 0.0092         | -0.0078         | -0.0023         | -0.002        | -0.0098     | 0.0175                   |        |
| Arthritis                  | -0.2094                                                                             | -0.083         | 0.1064          | 0.1546          | -0.0055       | 0.0192      | 0.2094                   | -0.003                                                                                           | -0.0082        | -0.0147         | -0.0048         | -0.0048       | -0.0054     | 0.0147                   | -0.0029                                                                                              | -0.0082        | -0.015          | -0.0043         | -0.0048       | -0.0038     | 0.015                    |        |
| Asthma                     | -0.0443                                                                             | -0.0334        | -0.0059         | 0.0327          | 0.0317        | 0.0278      | 0.0443                   | 0.0002                                                                                           | -0.0039        | -0.0203         | -0.014          | -0.0014       | -0.0209     | 0.0209                   | 0.0003                                                                                               | -0.0029        | -0.02           | -0.014          | -0.0003       | -0.0211     | 0.0211                   |        |
| Cancer                     | -0.0218                                                                             | 0.0309         | -0.0132         | -0.0106         | -0.0149       | -0.0285     | 0.0309                   | -0.0017                                                                                          | -0.0008        | -0.0049         | 0.004           | -0.0016       | 0.0086      | 0.0086                   | -0.0026                                                                                              | -0.0013        | -0.0051         | 0.0042          | -0.0027       | 0.0106      | 0.0106                   |        |
| CKD                        | -0.1258                                                                             | -0.0386        | 0.0873          | 0.1805          | 0.1347        | 0.0999      | 0.1805                   | 0.0114                                                                                           | 0.0153         | 0.0053          | 0.0137          | -0.0011       | -0.002      | 0.0153                   | 0.0113                                                                                               | 0.0142         | 0.0056          | 0.0131          | -0.0024       | -0.0008     | 0.0142                   |        |
| COPD                       | -0.1766                                                                             | -0.1467        | -0.0095         | 0.0445          | -0.0413       | 0.0384      | 0.1766                   | 0.0138                                                                                           | 0.0069         | 0.0046          | 0.0047          | -0.0036       | -0.0085     | 0.0138                   | 0.0139                                                                                               | 0.0089         | 0.0045          | 0.0048          | -0.0033       | -0.0075     | 0.0139                   |        |
| Depression                 | 0.4736                                                                              | 0.1887         | 0.5993          | 0.181           | 0.6425        | 0.5622      | 0.6425                   | 0.0229                                                                                           | 0.0041         | -0.0059         | 0.0105          | 0.0041        | -0.0009     | 0.0229                   | 0.0231                                                                                               | 0.0061         | -0.0064         | 0.0111          | 0.0051        | -0.0009     | 0.0231                   |        |
| Diabetes                   | -0.0601                                                                             | 0.0525         | 0.093           | 0.219           | 0.2556        | 0.1142      | 0.2556                   | -0.0002                                                                                          | 0.0069         | -0.0022         | -0.0028         | -0.0032       | -0.0147     | 0.0147                   | -0.0007                                                                                              | 0.0061         | -0.0035         | -0.0036         | -0.0039       | -0.0135     | 0.0135                   |        |
| Drug Abuse                 | -0.2264                                                                             | -0.165         | -0.0042         | 0.0647          | -0.1161       | 0.0578      | 0.2264                   | 0.0167                                                                                           | 0.019          | 0.0031          | 0.0016          | 0.0012        | -0.0067     | 0.019                    | 0.0178                                                                                               | 0.0189         | 0.0026          | 0.0015          | 0.0014        | -0.0055     | 0.0189                   |        |
| Epilepsy                   | 0.0042                                                                              | 0.032          | 0.0456          | 0.0379          | 0.0691        | 0.1023      | 0.1023                   | 0.0184                                                                                           | 0.0008         | 0.0006          | -0.0042         | -0.0031       | -0.0047     | 0.0184                   | 0.0189                                                                                               | 0              | 0.0009          | -0.0037         | -0.0027       | -0.005      | 0.0189                   |        |
| Hearing Impairment         | 0.0747                                                                              | 0.05           | 0.0693          | 0.0545          | 0.0949        | 0.026       | 0.0949                   | -0.0112                                                                                          | -0.0077        | -0.0069         | -0.0001         | 0.0021        | 0.0029      | 0.0112                   | -0.0112                                                                                              | -0.0076        | -0.0064         | 0               | 0.0012        | 0.0033      | 0.0112                   |        |
| Hip/Pelvic Fracture        | -0.0064                                                                             | -0.0535        | 0.0673          | 0.0014          | 0.0078        | 0.0615      | 0.0673                   | 0.0139                                                                                           | -0.0027        | -0.0034         | -0.0035         | -0.0011       | 0.0049      | 0.0139                   | 0.0148                                                                                               | 0.0009         | -0.0028         | -0.0032         | -0.0018       | 0.0068      | 0.0148                   |        |
| Liver Disease              | -0.0367                                                                             | -0.0056        | 0.0033          | 0.0465          | 0.0243        | 0.0387      | 0.0465                   | -0.0127                                                                                          | 0.0033         | -0.0257         | 0.0101          | -0.0315       | 0.0005      | 0.0315                   | -0.0135                                                                                              | 0.0031         | -0.0258         | 0.0096          | -0.0309       | 0.0003      | 0.0309                   |        |
| Migraine/Headache          | 0.0004                                                                              | 0.0534         | -0.0144         | -0.0193         | 0.0261        | 0.0542      | 0.0542                   | -0.0025                                                                                          | -0.0113        | -0.005          | 0.0061          | -0.0072       | -0.0078     | 0.0113                   | -0.0025                                                                                              | -0.0098        | -0.0035         | 0.0059          | -0.008        | -0.0082     | 0.0098                   |        |
| Mobility Impairment        | 0.0101                                                                              | 0.0326         | 0.0845          | 0.1308          | 0.1654        | 0.1066      | 0.1654                   | 0.0081                                                                                           | 0.0018         | -0.0059         | -0.0084         | -0.0108       | -0.0063     | 0.0108                   | 0.0065                                                                                               | 0.0035         | -0.0057         | -0.0083         | -0.011        | -0.0065     | 0.011                    |        |
| Obesity                    | -0.0384                                                                             | 0.0331         | 0.1365          | 0.1948          | 0.2336        | 0.1589      | 0.2336                   | 0.0119                                                                                           | 0.0144         | 0.008           | 0.0072          | 0.0069        | 0.0029      | 0.0144                   | 0.0122                                                                                               | 0.015          | 0.0076          | 0.0066          | 0.0068        | 0.0026      | 0.015                    |        |
| Osteoporosis               | -0.0125                                                                             | -0.005         | 0.052           | 0.0088          | -0.007        | -0.0021     | 0.052                    | -0.0137                                                                                          | -0.012         | -0.009          | -0.005          | -0.0056       | -0.006      | 0.0137                   | -0.0135                                                                                              | -0.012         | -0.0083         | -0.004          | -0.0058       | -0.0041     | 0.0135                   |        |
| Spine Injury               | -0.0516                                                                             | -0.0382        | 0.025           | 0.0232          | 0.0135        | 0.0484      | 0.0516                   | 0.0127                                                                                           | 0.0024         | -0.002          | -0.0015         | 0.002         | -0.0034     | 0.0127                   | 0.0124                                                                                               | 0.0035         | -0.0013         | -0.0013         | 0.0027        | -0.0025     | 0.0124                   |        |
| Vision Impairment          | 0.1008                                                                              | 0.0973         | -0.0147         | -0.0037         | 0.0801        | 0.0324      | 0.1008                   | -0.0112                                                                                          | -0.0084        | -0.0073         | 0.001           | -0.0036       | -0.0041     | 0.0112                   | -0.0108                                                                                              | -0.008         | -0.0067         | 0.0011          | -0.0035       | -0.0034     | 0.0108                   |        |

<sup>a</sup>Standardized differences across six pairwise comparisons between each drug combination group and the opioid/benzodiazepine group before IPTW with propensity score and after IPTW with propensity score for the falls and fractures models.

<sup>b</sup>The maximum difference is the absolute value of the maximum standardized difference across six pairwise comparisons between each drug combination group and the opioid/benzodiazepine group, presented to illustrate the covariate balance after IPTW with propensity score.

**Supplementary Table 7. Sensitivity Analyses**

| Drug Combination   | Excluding Cancer Patients <sup>a</sup> (n=41047) |                   | 3 Month Lookback <sup>a</sup> (n=25040) |                   |
|--------------------|--------------------------------------------------|-------------------|-----------------------------------------|-------------------|
|                    | Fall                                             | Fracture          | Fall                                    | Fracture          |
| Benzo + Opioid     | REF                                              | REF               | REF                                     | REF               |
| ≥3 drugs           | 1.41 (1.15, 1.73)                                | 1.43 (1.04, 1.96) | 1.21 (0.90, 1.62)                       | 1.32 (0.86, 2.02) |
| Benzo + GABA       | 1.04 (0.88, 1.23)                                | 0.75 (0.56, 0.99) | 1.01 (0.82, 1.25)                       | 0.76 (0.53, 1.08) |
| Benzo + SSRI/SNRI  | 0.90 (0.72, 1.12)                                | 0.82 (0.57, 1.18) | 0.77 (0.57, 1.03)                       | 0.64 (0.39, 1.06) |
| GABA + SSRI/SNRI   | 1.00 (0.83, 1.20)                                | 1.05 (0.79, 1.40) | 1.02 (0.80, 1.30)                       | 1.06 (0.73, 1.53) |
| Opioid + GABA      | 1.16 (0.99, 1.37)                                | 1.21 (0.94, 1.56) | 1.32 (1.08, 1.62)                       | 1.44 (1.06, 1.95) |
| Opioid + SSRI/SNRI | 1.07 (0.89, 1.28)                                | 1.15 (0.87, 1.51) | 1.17 (0.94, 1.46)                       | 1.12 (0.80, 1.59) |

<sup>a</sup>The sensitivity analyses were fully adjusted for all demographic and clinical characteristics, as in the fully adjusted multivariable model from the main analysis, but hazard ratios characteristics are not presented in this table for the sake of brevity.

Supplementary Table 8. Demographics Comparison the Cohorts from the Primary Analysis and the Sensitivity Analyses

|                              |                       | Primary Analysis |       | No Cancer |       | 3 Month Lookback |       |
|------------------------------|-----------------------|------------------|-------|-----------|-------|------------------|-------|
|                              |                       | N                | %     | N         | %     | N                | %     |
| Total                        |                       | 47,964           | 100%  | 41,047    | 100%  | 25,040           | 100%  |
| Drug Combo                   | Benzo/Opioid          | 10,261           | 21.4% | 8,750     | 21.3% | 5,150            | 20.6% |
|                              | 3+ Combo              | 5,499            | 11.5% | 4,718     | 11.5% | 2,644            | 10.6% |
|                              | Benzo + GABA          | 2,775            | 5.8%  | 2,394     | 5.8%  | 1,261            | 5.0%  |
|                              | Benzo + SSRI or SNRI  | 9,541            | 19.9% | 8,209     | 20.0% | 5,215            | 20.8% |
|                              | GABA + SSRI or SNRI   | 4,420            | 9.2%  | 3,720     | 9.1%  | 2,313            | 9.2%  |
|                              | Opioid + GABA         | 8,625            | 18.0% | 7,395     | 18.0% | 4,705            | 18.8% |
|                              | Opioid + SSRI or SNRI | 6,843            | 14.3% | 5,861     | 14.3% | 3,752            | 15.0% |
| Sex                          | Male                  | 10,570           | 22.0% | 8,746     | 21.3% | 5,651            | 22.6% |
|                              | Female                | 37,394           | 78.0% | 32,301    | 78.7% | 19,389           | 77.4% |
| Age (mean, SD)               |                       | 75.9             | 7.1   | 75.8      | 7.2   | 76.4             | 7.3   |
| Age Category                 | 65-74                 | 22,662           | 47.2% | 19,775    | 48.2% | 11,217           | 44.8% |
|                              | 75-84                 | 17,993           | 37.5% | 15,134    | 36.9% | 9,619            | 38.4% |
|                              | 85+                   | 7,309            | 15.2% | 6,138     | 15.0% | 4,204            | 16.8% |
| Race                         | White                 | 42,008           | 87.6% | 35,846    | 87.3% | 21,690           | 86.6% |
|                              | Black                 | 2,579            | 5.4%  | 2,226     | 5.4%  | 1,416            | 5.7%  |
|                              | Hispanic              | 2,168            | 4.5%  | 1,929     | 4.7%  | 1,239            | 4.9%  |
|                              | Other                 | 1,209            | 2.5%  | 1,046     | 2.5%  | 695              | 2.8%  |
| Region                       | MW                    | 11,107           | 23.2% | 9,571     | 23.3% | 5,706            | 22.8% |
|                              | NE                    | 8,204            | 17.1% | 6,853     | 16.7% | 4,524            | 18.1% |
|                              | SO                    | 20,784           | 43.3% | 17,907    | 43.6% | 10,588           | 42.3% |
|                              | WE                    | 7,869            | 16.4% | 6,716     | 16.4% | 4,222            | 16.9% |
| Original Entitlement         | Disabled/ESRD         | 13,297           | 27.7% | 11,603    | 28.3% | 6,352            | 25.4% |
| Medicaid Dual Eligibility    | Old Age               | 34,667           | 72.3% | 29,444    | 71.7% | 18,688           | 74.6% |
| Number of days on drug combo | No                    | 35,329           | 73.7% | 29,985    | 73.1% | 18,491           | 73.8% |
|                              | Yes                   | 12,635           | 26.3% | 11,062    | 26.9% | 6,549            | 26.2% |
| History of Fall              | Mean, SD              | 32.0             | 32.3  | 32.4      | 32.5  | 28.2             | 26.4  |
|                              | Median, Q1-Q3         | 26               | 14-30 | 26        | 14-30 | 23               | 13-30 |
| History of Fracture          |                       | 8,437            | 17.6% | 7,090     | 17.3% | 4,261            | 17.0% |
| History of Hospitalization   |                       | 3,537            | 7.4%  | 2,921     | 7.1%  | 1,829            | 7.3%  |
|                              |                       | 20,997           | 43.8% | 17,213    | 41.9% | 10,770           | 43.0% |
| Chronic Conditions           | Alcohol Use Disorders | 2,131            | 4.4%  | 1,830     | 4.5%  | 1,100            | 4.4%  |
|                              | Alzheimer/Dementia    | 10,202           | 21.3% | 8,748     | 21.3% | 5,474            | 21.9% |
|                              | Arthritis             | 37,490           | 78.2% | 32,155    | 78.3% | 19,343           | 77.2% |
|                              | Asthma                | 6,543            | 13.6% | 5,560     | 13.5% | 3,391            | 13.5% |
|                              | Cancer                | 6,917            | 14.4% | 0         | 0.0%  | 3,702            | 14.8% |
|                              | CKD                   | 18,364           | 38.3% | 15,378    | 37.5% | 9,426            | 37.6% |
|                              | COPD                  | 14,217           | 29.6% | 11,790    | 28.7% | 7,098            | 28.3% |
|                              | Depression            | 29,905           | 62.3% | 25,512    | 62.2% | 14,733           | 58.8% |
|                              | Diabetes              | 17,962           | 37.4% | 15,305    | 37.3% | 9,254            | 37.0% |
|                              | Drug Use Disorder     | 5,038            | 10.5% | 4,302     | 10.5% | 2,163            | 8.6%  |
|                              | Epilepsy              | 2,075            | 4.3%  | 1,787     | 4.4%  | 1,061            | 4.2%  |
|                              | Hearing Impairment    | 4,553            | 9.5%  | 3,823     | 9.3%  | 2,476            | 9.9%  |
|                              | Hip/Pelvic Fracture   | 1,001            | 2.1%  | 807       | 2.0%  | 532              | 2.1%  |
|                              | Liver Disease         | 3,870            | 8.1%  | 3,149     | 7.7%  | 2,000            | 8.0%  |
|                              | Migraine/Headache     | 4,362            | 9.1%  | 3,799     | 9.3%  | 2,171            | 8.7%  |
|                              | Mobility Impairment   | 2,744            | 5.7%  | 2,357     | 5.7%  | 1,445            | 5.8%  |
|                              | Obesity               | 13,994           | 29.2% | 11,994    | 29.2% | 6,995            | 27.9% |
|                              | Osteoporosis          | 7,817            | 16.3% | 6,466     | 15.8% | 4,020            | 16.1% |
|                              | Spine Injury          | 1,154            | 2.4%  | 939       | 2.3%  | 573              | 2.3%  |
|                              | Vision Impairment     | 14,508           | 30.2% | 12,410    | 30.2% | 7,713            | 30.8% |
